# Supplementary material
Source: ML conference proceedings conference paper supplement (https://openreview.net/forum?id=L5b6jUonKFB)
Supplement: supplementary_material [file attachment]

**Dummy PDF file**
